# Supplementary material
Source: MDPI journal article supplement (https://www.mdpi.com/2072-4292/14/21/5363)
Supplement: s1 [file s1]

Table S2: Table with reclassification scheme of original Web of Science categories. Individual tags from reviewed articles are separated by a forward slash.

| Reclassified Web of Science Categories    | Original Web of Science Categories                                                                                                                                                                                                                                                                                                                                                                                                                                                                                                                                                                                                   |
|-------------------------------------------|--------------------------------------------------------------------------------------------------------------------------------------------------------------------------------------------------------------------------------------------------------------------------------------------------------------------------------------------------------------------------------------------------------------------------------------------------------------------------------------------------------------------------------------------------------------------------------------------------------------------------------------|
| Ecology                                   | Ecology                                                                                                                                                                                                                                                                                                                                                                                                                                                                                                                                                                                                                              |
| Environmental Sciences                    | Biodiversity Conservation, Ecology /<br>Biodiversity Conservation, Ecology,<br>Environmental Sciences /<br>Biodiversity Conservation, Environmental<br>Sciences /<br>Ecology, Environmental Sciences /<br>Ecology, Evolutionary Biology /<br>Ecology, Geography, Physical /<br>Ecology, Geography, Physical, Geosciences,<br>Multidisciplinary /<br>Environmental Sciences /<br>Environmental Sciences, Meteorology and<br>Atmospheric Sciences /<br>Forestry /<br>Geosciences, Multidisciplinary, Multidisciplinary<br>Sciences /<br>Multidisciplinary Sciences /<br>Plant Sciences, Ecology /<br>Plant Sciences, Ecology, Forestry |
| Environmental Sciences and Remote Sensing | Computer Science, Information Systems,<br>Geography, Physical, Remote Sensing /<br>Environmental Sciences, Geosciences,<br>Multidisciplinary, Remote Sensing, Imaging<br>Science and Photographic Technology /<br>Environmental Sciences, Remote Sensing,<br>Imaging Science and Photographic Technology /<br>Geochemistry and Geophysics, Engineering,<br>Electrical and Electronic, Remote Sensing,<br>Imaging Science and Photographic Technology /<br>Geography, Physical, Geosciences,<br>Multidisciplinary, Remote Sensing, Imaging<br>Science and Photographic Technology /<br>Geography, Physical, Remote Sensing            |
| Remote Sensing                            | Remote Sensing / Remote Sensing, Imaging<br>Science and Photographic Technology                                                                                                                                                                                                                                                                                                                                                                                                                                                                                                                                                      |
