# Supplementary material
Source: MDPI journal article supplement (https://www.mdpi.com/2072-4292/14/21/5363)
Supplement: s1 [file s1 › Table S1.xlsx]

## Sheet: GeneralInfos
Source of Information:	Metadata for Atributes:
Web of Science	Authors	list of all authors
	Article Title	article title
	Addresses	author names grouped by affiliations
	Publisher	name of Publisher
	Source Title	Journal Title (name)
	Year	year of publication
	Citations	citation frequency
	DOI	DOI
	WoS Categories	classification of articles by WoS categories
	Abstract	abstract
Edited / Coding	First Author Affiliation Country	country name of affiliation of first author
	Impact Factor	Journal Impact Factor
	First Author	name of First Author
	Forest type	frigid, sub-frigid, temperate, mediterranean, sub-tropical, tropical according to Xu et al. 2022 (https://doi.org/10.3390/su14020634)
	Investigated Country	investigated country (study area), or: Europe if continental, or: global if global scale
	Investigated Continent	investigated continent (study area)
	Sensor Type	1 = multispectral, 2 = hyperspectral, 3 = SAR, 4 = LiDAR, 5 = topo Radar (e.g. SRTM), [1,3] = multispectral and SAR
	Sensor Name	e.g. Sentinel-1, Sentinel-2, Landsat 8, MODIS, …
	Spatial Scale	1 = airborne, 2 = spaceborne, 3 = field data, [1,3] = airborne and field data
	Spatial Resolution	1 = < =5 m, 2 = >5 - <=10 m, 3 = >10 - 30 m, 4 = > 30 m, [1,3] = < 5 m and 10 - 30 m , e.g. WorldView + Landsat
	Start	start year of analysis (inclusive)
	End	end year of analysis (inclusive)
	Temporal Resolution Field Data	0 = no field data used, 1 = mono-temporal (taken at one period or aggregating multi-temporal data to a single period, e.g. field data collected over a period but treated as one temporal collection), 2 = multi-temporal, 3 = time-series (> 12 images)
	Temporal Resolution RS Data	1 = mono-temporal, 2 = multi-temporal, 3 = time-series (> 12 images)
	Spectral Diversity Concept	according to Wang & Gamon 2019: 1 = vegetation indices (e.g. NDVI sd, CV), 2 = spectral information content (clustering, PCA, correlations), 3 = spectral species (Feret & Asner 2014 concept)
	Modelling Response	alpha, beta, gamma
	Thematic Focus Modelling Response	1 = flora, 2 = fauna, 3 = fauna + flora
	Model Type	RandomForest, linear regression, Regression Kriging, Rao, ANOVA, GAM, GLM, PLSR, DeepLearning, explorative statistics (mean, standard deviation, coefficient of variation, Euclidean distance), spectral species concept
	Model Predictors	1 = airborne metrics, 2 = spaceborne metrics, 3 = topography, 4 = climate, 5 = field work, [1,2] = airborne and spaceborne metrics
	Bands	list of spectral bands of optical sensors: blue, green, red, red edge, nir, swir; 0 = not applicable (i.e. no optical sensor used), 1 = full spectra (blue-swir) hyperspectral, 2 = full spectra (blue-swir) multispectral
	Indices	list of spectral indices of optical sensors: ndvi, evi, savi, …; 0 = not applicable (i.e. no optical sensor used)

## Sheet: Articles
Authors	First Author	Article Title	Year	Publisher	Source Title	Impact Factor	DOI	First Author Affiliation Country	Citations	Abstract	Forest Type	Investigated Country	Investigated Continent	Sensor Type	Sensor Name	Spatial Scale	Spatial Resolution	Start	End	Temporal Resolution Field Data	Temporal Resolution RS Data	Modelling Response	Spectral Diversity Concept	Thematic Focus Modelling Response	Model Type	Model Predictors	Bands	Indices
Agarwal, S; Rocchini, D; Marathe, A; Nagendra, H	Agarwal, S	Exploring the Relationship between Remotely-Sensed Spectral Variables and Attributes of Tropical Forest Vegetation under the Influence of Local Forest Institutions	2016	MDPI	ISPRS INTERNATIONAL JOURNAL OF GEO-INFORMATION	2.899	10.3390/ijgi5070117	India	3	Conservation of forests outside protected areas is essential for maintaining forest connectivity, which largely depends on the effectiveness of local institutions. In this study, we use Landsat data to explore the relationship between vegetation structure and forest management institutions, in order to assess the efficacy of local institutions in management of forests outside protected areas. The…	tropical	India	Asia	1	Landsat 8	[2,3]	3	2013	2013	1	1	[alpha,beta]	1	1	[explorative statistics,quantile regression]	2	2	[ndvi,tasseled cap]
Arekhi, M; Yilmaz, OY; Yilmaz, H; Akyuz, YF	Arekhi, M	Can tree species diversity be assessed with Landsat data in a temperate forest?	2017	SPRINGER	ENVIRONMENTAL MONITORING AND ASSESSMENT	2.513	10.1007/s10661-017-6295-6	Turkey	19	The diversity of forest trees as an indicator of ecosystem health can be assessed using the spectral characteristics of plant communities through remote sensing data. The objectives of this study were to investigate alpha and beta tree diversity using Landsat data for six dates in the Gonen dam watershed of Turkey. We used richness and the Shannon and Simpson diversity indices to calculate tree a…	temperate	Turkey	Asia	1	Landsat 8	[2,3]	3	2013	2013	1	2	[alpha,beta]	1	1	[explorative statistics,quantile regression]	2	2	[ndvi,tasseled cap,evi,dvi,vi]
Bae, S; Levick, SR; Heidrich, L; Magdon, P; Leutner, BF; Wollauer, S; Serebryanyk, A; Nauss, T; Krzystek, P; Gossner, MM; Schall, P; Heibl, C; Bassler, C; Doerfler, I; Schulze, ED; Krah, FS; Culmsee, H; Jung, K; Heurich, M; Fischer, M; Seibold, S; Thorn, S; Gerlach, T; Hothorn, T; Weisser, WW; Muller, J	Bae, S	Radar vision in the mapping of forest biodiversity from space	2019	NATURE PUBLISHING GROUP	NATURE COMMUNICATIONS	14.919	10.1038/s41467-019-12737-x	Germany	27	Recent progress in remote sensing provides much-needed, large-scale spatio-temporal information on habitat structures important for biodiversity conservation. Here we examine the potential of a newly launched satellite-borne radar system (Sentinel-1) to map the biodiversity of twelve taxa across five temperate forest regions in central Europe. We show that the sensitivity of radar to habitat stru…	temperate	Germany	Europe	[4,3]	[ALS, Sentinel-1]	[1,2,3]	[1,2]	2016	2016	1	3	alpha	2	3	explorative statistics	[1,2]	0	0
Baldeck, CA; Asner, GP	Baldeck, CA	Estimating Vegetation Beta Diversity from Airborne Imaging Spectroscopy and Unsupervised Clustering	2013	MDPI	REMOTE SENSING	4.848	10.3390/rs5052057	United States	44	Airborne remote sensing has an important role to play in mapping and monitoring biodiversity over large spatial scales. Techniques for applying this technology to biodiversity mapping have focused on remote species identification of individual crowns; however, this requires collection of a large number of crowns to train a classifier, which may limit the usefulness of this approach in many study …	subtropical	South Africa	Africa	2	CAO Alpha	[1,3]	1	2008	2008	1	1	beta	2	1	[k-means clustering,SVM,Bray-Curtis]	1	[blue,green,red,nir]	ndvi
Bawa, K; Rose, J; Ganeshaiah, KN; Barve, N; Kiran, MC; Umashaanker, R	Bawa, K	Assessing biodiversity from space: an example from the Western Ghats, India	2002	RESILIENCE ALLIANCE	CONSERVATION ECOLOGY	999999	999999	United States	52	We demonstrate for the first time the potential use of satellite imagery to characterize areas of high and low species richness of trees in tropical forests. Our studies, conducted in the Biligiri Rangaswamy hills in the Western Ghats, India, show a high positive correlation between species richness and the Normalized Difference Vegetation Index (NDVI), which is an index of green biomass. We disc…	tropical	India	Asia	1	Resourcesat-1 LISS-III	[2,3]	3	1998	1999	1	2	alpha	1	1	explorative statistics	2	[red,nir]	ndvi
Carlson, KM; Asner, GP; Hughes, RF; Ostertag, R; Martin, RE	Carlson, KM	Hyperspectral remote sensing of canopy biodiversity in Hawaiian lowland rainforests	2007	SPRINGER	ECOSYSTEMS	4.217	10.1007/s10021-007-9041-z	United States	151	Mapping biological diversity is a high priority for conservation research, management and policy development, but few studies have provided diversity data at high spatial resolution from remote sensing. We used airborne imaging spectroscopy to map woody vascular plant species richness in lowland tropical forest ecosystems in Hawai'i. Hyperspectral signatures spanning the 400-2,500 nm wavelength r…	tropical	United States	North America	2	AVIRIS	[1,3]	1	2005	2005	1	1	alpha	1	1	[explorative statistics, linear regression]	1	1	0
Chaurasia, AN; Dave, MG; Parmar, RM; Bhattacharya, B; Marpu, PR; Singh, A; Krishnayya, NSR	Chaurasia, AN	Inferring Species Diversity and Variability over Climatic Gradient with Spectral Diversity Metrics	2020	MDPI	REMOTE SENSING	4.848	10.3390/rs12132130	India	3	Filling in the void between forest ecology and remote sensing through monitoring biodiversity variables is of great interest. In this study, we utilized imaging spectroscopy data from the ISRO-NASA Airborne Visible InfraRed Imaging Spectrometer-Next Generation (AVIRIS-NG) India campaign to investigate how the measurements of biodiversity attributes of forests over wide areas can be augmented by s…	tropical	India	Asia	2	AVIRIS	[1,3]	1	2016	2016	1	1	[alpha,beta]	2	1	[explorative statistics,redundancy analysis,SVM classification]	1	1	ndvi
Chaves, PP; Zuquim, G; Ruokolainen, K; Van Doninck, J; Kalliola, R; Rivero, EG; Tuomisto, H	Chaves, PP	Mapping Floristic Patterns of Trees in Peruvian Amazonia Using Remote Sensing and Machine Learning	2020	MDPI	REMOTE SENSING	4.848	10.3390/rs12091523	Finland	5	Recognition of the spatial variation in tree species composition is a necessary precondition for wise management and conservation of forests. In the Peruvian Amazonia, this goal is not yet achieved mostly because adequate species inventory data has been lacking. The recently started Peruvian national forest inventory (INFFS) is expected to change the situation. Here, we analyzed genus-level varia…	tropical	Peru	South America	[1,1,5]	[Landsat 5, Landsat 7, SRTM]	[2,3]	[3,3,3]	2000	2009	1	3	[alpha,beta]	2	1	[NMDS,RF regression,Mantel test]	[2,3,4,5]	2	0
Chaves, PP; Echeverri, NR; Ruokolainen, K; Kalliola, R; Van Doninck, J; Rivero, EG; Zuquim, G; Tuomisto, H	Chaves, PP	Using forestry inventories and satellite imagery to assess floristic variation in bamboo-dominated forests in Peruvian Amazonia	2021	WILEY	JOURNAL OF VEGETATION SCIENCE	2.685	10.1111/jvs.12938	Finland	1	Questions Does the floristic composition of trees differ between bamboo forests and adjacent non-bamboo forests? Can the degree of compositional differences be predicted from differences in canopy reflectance as measured by Landsat satellites? Are the results sensitive to different taxonomical data cleaning strategies, or to which tree-size class is considered? Are some tree taxa associated with …	tropical	Peru	South America	[1,5]	[Landsat 7,ASTER]	[2,3]	[3,3]	2014	2016	1	3	alpha	2	1	[PCA,segmentation,Mantel test,Sorensen index,NMDS,ANOSIM,Euclidean distance]	[2,3,5]	2	ndvi
Chi, Y; Sun, JK; Fu, ZY; Xie, ZL	Chi, Y	Spatial pattern of plant diversity in a group of uninhabited islands from the perspectives of island and site scales	2019	ELSEVIER SCIENCE BV	SCIENCE OF THE TOTAL ENVIRONMENT	7.963	10.1016/j.scitotenv.2019.01.352	China	8	Uninhabited islands are important for providing isolated habitats for unique biological resources, and revealing the spatial pattern of plant diversity is of great significance for the island biodiversity conservation. A total of 15 uninhabited islands in Miaodao Archipelago, a group of typical uninhabited islands in North China, were selected as the study area. The multiple gradients at island a…	temperate	China	Asia	1	Landsat 8	[2,3]	3	ka	ka	1	1	[alpha,beta]	1	1	[linear regression,cannonical correlation ordination]	[2,5]	ka	ndvi
Chitale, VS; Behera, MD; Roy, PS	Chitale, VS	Deciphering plant richness using satellite remote sensing: a study from three biodiversity hotspots	2019	SPRINGER	BIODIVERSITY AND CONSERVATION	3.549	10.1007/s10531-019-01761-4	India	9	The spectral variation hypothesis (SVH)' assumes spectral variability as a result of variation in species richness. In the present study, we explore the potential of satellite datasets in identifying the patterns in species richness in part of three global biodiversity hotspots falling in India viz., Himalaya, Indo-Burma, and Western Ghats. We used generalized linear models to correlate remote se…	tropical	India	Asia	[1,5]	[Landsat 5,SRTM]	[2,3]	[3,3]	2010	2010	1	3	alpha	1	1	[explorative statistics,GLM]	2	2	[ndvi,evi,msavi2,ndwi]
Chraibi, E; Arnold, H; Luque, S; Deacon, A; Magurran, AE; Feret, JB	Chraibi, E	A Remote Sensing Approach to Understanding Patterns of Secondary Succession in Tropical Forest	2021	MDPI	REMOTE SENSING	4.848	10.3390/rs13112148	France	0	Monitoring biodiversity on a global scale is a major challenge for biodiversity conservation. Field assessments commonly used to assess patterns of biodiversity and habitat condition are costly, challenging, and restricted to small spatial scales. As ecosystems face increasing anthropogenic pressures, it is important that we find ways to assess patterns of biodiversity more efficiently. Remote se…	tropical	Trinidad and Tobago	South America	1	Sentinel-2	[2,3]	2	2019	2019	1	1	[alpha,beta]	3	1	spectral species concept	2	2	ndvi
Da Re, D; De Clercq, EM; Tordoni, E; Madder, M; Rousseau, R; Vanwambeke, SO	Da Re, D	Looking for Ticks from Space: Using Remotely Sensed Spectral Diversity to Assess Amblyomma and Hyalomma Tick Abundance	2019	MDPI	REMOTE SENSING	4.848	10.3390/rs11070770	Belgium	3	Landscape heterogeneity, as measured by the spectral diversity of satellite imagery, has the potential to provide information on the resources available within the movement capacity range of arthropod vectors, and to help predict vector abundance. The Spectral Variation Hypothesis states that higher spectral diversity is positively related to a higher number of ecological niches present in the la…	tropical	Benin	Africa	1	MODIS	[2,3]	4	2011	2011	1	1	[alpha,beta]	2	2	[GLM,Rao,Texture,PCA]	2	2	ndvi
Dahlin, KM	Dahlin, KM	Spectral diversity area relationships for assessing biodiversity in a wildland-agriculture matrix	2016	WILEY	ECOLOGICAL APPLICATIONS	4.657	10.1002/eap.1390	United States	19	Species-area relationships have long been used to assess patterns of species diversity across scales. Here, this concept is extended to spectral diversity using hyperspectral data collected by NASA's Airborne Visible/Infrared Imaging Spectrometer (AVIRIS) over western Michigan. This mixture of mesic forest and agricultural lands offers two end-points on the local-scale diversity continuum; one se…	subtropical	United States	North America	2	AVIRIS	1	1	2009	2009	0	1	[alpha,beta]	2	1	[Convex hull volume, variance, PCA]	1	1	[ndvi,ndwi]
Draper, FC; Baraloto, C; Brodrick, PG; Phillips, OL; Martinez, RV; Coronado, ENH; Baker, TR; Gomez, RZ; Guerra, CAA; Flores, M; Villacorta, RG; Fine, PVA; Freitas, L; Monteagudo-Mendoza, A; Brienen, RJW; Asner, GP	Draper, FC	Imaging spectroscopy predicts variable distance decay across contrasting Amazonian tree communities	2019	WILEY	JOURNAL OF ECOLOGY	6.256	10.1111/1365-2745.13067	United States	16	The forests of Amazonia are among the most biodiverse on Earth, yet accurately quantifying how species composition varies through space (i.e., beta-diversity) remains a significant challenge. Here, we use high-fidelity airborne imaging spectroscopy from the Carnegie Airborne Observatory to quantify a key component of beta-diversity, the distance decay in species similarity through space, across t…	tropical	Peru	South America	[1,4]	CAO AToMS	[1,3]	1	2012	2012	1	1	beta	3	1	spectral species concept	1	1	0
Fairbanks, DHK; McGwire, KC	Fairbanks, DHK	Patterns of floristic richness in vegetation communities of California: regional scale analysis with multi-temporal NDVI	2004	WILEY	GLOBAL ECOLOGY AND BIOGEOGRAPHY	7.144	10.1111/j.1466-822X.2004.00092.x	United States	80	Aim Applying water-energy dynamics and heterogeneity theory to explain species richness via remote sensing could allow for the regional characterization and monitoring of vegetation community assemblages and their environment. We assess the relationship of multi-temporal normalized difference vegetation index (NDVI) to plant species richness in vegetation communities. Location California, USA. Me…	subtropical	United States	North America	1	AVHRR	[2,3]	4	1990	1996	1	2	alpha	1	1	explorative statistics	2	[red,nir]	ndvi
Farwell, LS; Gudex-Cross, D; Anise, IE; Bosch, MJ; Olah, AM; Radeloff, VC; Razenkova, E; Rogova, N; Silveira, EMO; Smith, MM; Pidgeon, AM	Farwell, LS	Satellite image texture captures vegetation heterogeneity and explains patterns of bird richness	2021	ELSEVIER SCIENCE INC	REMOTE SENSING OF ENVIRONMENT	10.164	10.1016/i.rse.2020.112175	United States	14	Addressing global declines in biodiversity requires accurate assessments of key environmental attributes determining patterns of species diversity. Spatial heterogeneity of vegetation strongly affects species diversity patterns, and measures of vegetation structure derived from lidar and satellite image texture analysis correlate well with species richness. Our goal here was to gain a better unde…	subtropical	United States	North America	[1,1,4]	[Sentinel-2,Landsat 8,NEON]	[1,2,3]	[2,3,1]	2017	2019	1	3	alpha	1	2	explorative statistics	[1,2,3,5]	[blue,red,nir]	evi
Fassnacht, FE; Mullerova, J; Conti, L; Malavasi, M; Schmidtlein, S	Fassnacht, FE	About the link between biodiversity and spectral variation	2022	WILEY	APPLIED VEGETATION SCIENCE	3.252	10.1111/avsc.12643	Germany	0	Aim The spectral variability hypothesis (SVH) suggests a link between spectral variation and plant biodiversity. The underlying assumptions are that higher spectral variation in canopy reflectance (depending on scale) is caused by either (1) variation in habitats or linked vegetation types or plant communities with their specific optical community traits or (2) variation in the species themselves…	temperate	Germany	Europe	1	Sentinel-2	[2,3]	2	2019	2019	1	1	alpha	2	1	explorative statistics	2	2	0
Feilhauer, H; Schmidtlein, S	Feilhauer, H	Mapping continuous fields of forest alpha and beta diversity	2009	WILEY-BLACKWELL PUBLISHING, INC	APPLIED VEGETATION SCIENCE	3.252	10.1111/j.1654-109X.2009.01037.x	Germany	59	Question How to map continuous fields of forest alpha and beta diversity in remote areas, based on easily accessible spatial data. Location Kyrgyzstan/Central Asia. Methods The study relied on a combination of predictive mapping and remote sensing. Punctual measurements of alpha diversity were linked to topography and reflectance using regression models. For beta diversity, ordination techniques …	temperate	Kyrgyzstan	Asia	1	ASTER	[2,3]	3	2001	2001	1	1	alpha	2	1	PLSR	[2,3,5]	2	ndvi
Feret, JB; Asner, GP	Feret, JB	Mapping tropical forest canopy diversity using high-fidelity imaging spectroscopy	2014	WILEY	ECOLOGICAL APPLICATIONS	4.657	10.1890/13-1824.1	United States	103	There is a growing need for operational biodiversity mapping methods to quantify and to assess the impact of climate change, habitat alteration, and human activity on ecosystem composition and function. Here, we present an original method for the estimation of alpha- and beta-diversity of tropical forests based on high-fidelity imaging spectroscopy. We acquired imagery over high-diversity Amazoni…	tropical	Peru	South America	[2,4]	CAO AToMS	[1,3]	1	2011	2011	1	1	[alpha,beta]	3	1	spectral species concept	1	1	0
Feret, JB; Asner, GP	Feret, JB	Microtopographic controls on lowland Amazonian canopy diversity from imaging spectroscopy	2014	WILEY	ECOLOGICAL APPLICATIONS	4.657	10.1890/13-1896.1	United States	12	Microtopographic variation is ubiquitous throughout lowland Amazonia, and it may impart patterns of species richness and abundance, and perhaps community compositional changes. To date, no studies have determined the degree to which lowland microtopography influences forest canopy diversity. We developed the first high-resolution maps of forest canopy diversity in Amazonia, focusing on four lands…	tropical	Peru	South America	[2,4]	CAO AToMS	[1,3]	1	2011	2011	1	1	[alpha,beta]	3	1	spectral species concept	1	1	ndvi
Feret, JB; de Boissieu, F	Feret, JB	biodivMapR: An r package for alpha- and beta-diversity mapping using remotely sensed images	2020	WILEY	METHODS IN ECOLOGY AND EVOLUTION	7.781	10.1111/2041-210X.13310	France	10	The accelerated erosion of biodiversity is a critical environmental challenge. Operational methods for the monitoring of biodiversity taking advantage of remotely sensed data are needed in order to provide information to ecologists and decision-makers. We present an R package designed to compute a selection of alpha- and beta-diversity indicators from optical imagery, based on spectral variation …	tropical	Cameroon	Africa	1	Sentinel-2	2	2	2018	2018	0	1	[alpha,beta]	3	1	spectral species concept	2	2	ndvi
Ferreira, MP; Zortea, M; Zanotta, DC; Shimabukuro, YE; de Souza, CR	Ferreira, MP	Mapping tree species in tropical seasonal semi-deciduous forests with hyperspectral and multispectral data	2016	ELSEVIER SCIENCE INC	REMOTE SENSING OF ENVIRONMENT	10.164	10.1016/j.rse.2016.03.021	Brazil	94	Accurately mapping the spatial distribution of tree species in tropical environments provides valuable insights for ecologists and forest managers. This process may play an important role in reducing fieldwork costs, monitoring changes in canopy biodiversity, and locating parent trees to collect seeds for forest restoration efforts. However, mapping tree species in tropical forests with remote se…	tropical	Brazil	South America	2	ProSpecTIR-VS	[1,3]	1	2010	2010	1	1	alpha	2	1	[LDA,SVM,RF,spectral angle]	1	1	[ndvi,evi,vig,vari,sipi,psnd,psri,cari,mcari,rendvi,ari,sr red green,cri1,cri2,ndwi,ndii,ndli,ndni,pri,rep]
Foody, GM; Cutler, MEJ	Foody, GM	Tree biodiversity in protected and logged Bornean tropical rain forests and its measurement by satellite remote sensing	2003	WILEY	JOURNAL OF BIOGEOGRAPHY	4.324	10.1046/j.1365-2699.2003.00887.x	Scotland	112	Aim Conservation activities have increasingly focused on issues at the level of the landscape but are constrained by limited data and knowledge relating to biodiversity at this scale. Satellite remote sensing has considerable, but under-exploited, potential as a source of information on biodiversity at the landscape level. Remote sensing has generally been used to assess biodiversity indirectly, …	tropical	Malaysia	Asia	1	Landsat 5	[2,3]	3	1997	1997	1	1	alpha	2	1	[neural network, explorative statistics]	2	2	0
Fricker, GA; Wolf, JA; Saatchi, SS; Gillespie, TW	Fricker, GA	Predicting spatial variations of tree species richness in tropical forests from high-resolution remote sensing	2015	WILEY	ECOLOGICAL APPLICATIONS	4.657	10.1890/14-1593.1	United States	19	There is an increasing interest in identifying theories, empirical data sets, and remote-sensing metrics that can quantify tropical forest alpha diversity at a landscape scale. Quantifying patterns of tree species richness in the field is time consuming, especially in regions with over 100 tree species/ha. We examine species richness in a 50-ha plot in Barro Colorado Island in Panama and test if …	tropical	Panama	North America	[1,4]	[Quickbird, ALS]	[1,2,3]	[1,1]	2004	2009	1	1	alpha	2	1	[OLS,GLS]	[1,2]	[blue,green,red,nir]	[rvi,ndvi,evi]
Gastauer, M; Nascimento, WR; Caldeira, CF; Ramos, SJ; Souza-Filho, PWM; Feret, JB	Gastauer, M	Spectral diversity allows remote detection of the rehabilitation status in an Amazonian iron mining complex	2022	ELSEVIER	INTERNATIONAL JOURNAL OF APPLIED EARTH OBSERVATION AND GEOINFORMATION	5.933	10.1016/j.jag.2021.102653	Brazil	1	Mineland rehabilitation is intended to reduce the overall impacts of mining on biodiversity and ecosystem services and requires periodic monitoring to guarantee institutional tractability and to refine rehabilitation practices. As time- and money-consuming field surveys challenge this monitoring, the aim of this study was to develop a remote sensing framework to assess the environmental quality o…	tropical	Brazil	South America	1	Sentinel-2	[2,3]	2	2017	2019	2	2	alpha	3	1	spectral species concept	2	2	ndvi
George-Chacon, SP; Dupuy, JM; Peduzzi, A; Hernandez-Stefanoni, JL	George-Chacon, SP	Combining high resolution satellite imagery and lidar data to model woody species diversity of tropical dry forests	2019	ELSEVIER SCIENCE BV	ECOLOGICAL INDICATORS	4.958	10.1016/j.ecolind.2019.02.015	Mexico	11	Tropical dry forests provide goods and ecosystem services that rely on their diversity and are vital for human wellbeing. However, they are among the most threatened ecosystems due mainly to conversion to agriculture. Accurate estimations of species diversity in tropical secondary forests are needed for effective conservation and forest management. We assessed the separate and combined performanc…	tropical	Mexico	North America	[1,4]	[RapidEye, ALS]	[1,2,3]	[1,1]	2012	2013	1	1	alpha	2	1	[multiple regression]	[1,2]	[blue,red,red edge]	[ndvi red edge,evi]
Gillespie, TW	Gillespie, TW	Predicting woody-plant species richness in tropical dry forests: A case study from south Florida, USA	2005	WILEY	ECOLOGICAL APPLICATIONS	4.657	10.1890/03-5304	United States	86	Tropical dry forests are one of the world's most endangered forest types. Currently there are no comparative data on extent or levels of species richness for remaining forest fragments. This research identifies landscape metrics and spectral indices that can be applied at the stand and patch level to predict woody-plant species richness in tropical dry forests. This study was undertaken in 18 sta…	tropical	United States	North America	1	Landsat 7	[2,3]	3	2002	2002	1	1	alpha	1	1	[explorative statistics,linear regression,multiple regression, t test]	2	[red,nir]	ndvi
Gillespie, TW; Zutta, BR; Early, MK; Saatchi, S	Gillespie, TW	Predicting and quantifying the structure of tropical dry forests in South Florida and the Neotropics using spaceborne imagery	2006	WILEY	GLOBAL ECOLOGY AND BIOGEOGRAPHY	7.144	10.1111/j.1466-8238.2005.00203.x	United States	26	Aim This research examines environmental theories and remote sensing methods that have been hypothesized to be associated with tropical dry forest structure. Location Tropical dry forests of South Florida and the Neotropics. Methods Field measurements of stand density, basal area and tree height were collected from 22 stands in South Florida and 30 stands in the Neotropics. In South Florida, fiel…	tropical	United States	North America	[1,5]	[Landsat 7, SRTM]	[2,3]	[3,3]	2002	2002	1	1	alpha	1	1	[explorative statistics,linear regression,multiple regression, t test]	[2,3]	[red,nir,swir]	[ndvi,iri,miri]
Gillespie, TW; Saatchi, S; Pau, S; Bohlman, S; Giorgi, AP; Lewis, S	Gillespie, TW	Towards quantifying tropical tree species richness in tropical forests	2009	TAYLOR & FRANCIS LTD	INTERNATIONAL JOURNAL OF REMOTE SENSING	3.151	10.1080/01431160802524552	United States	26	This letter reports tests of whether the normalized difference vegetation index (NDVI) from Landsat Enhanced Thematic Mapper Plus (ETM+) and radar backscatter (C-, L- and P-bands) from Airborne Synthetic Aperture Radar (AIRSAR) imagery can be used to estimate tree species richness from 251-ha plots within continuous lowland forest types (dry, moist, wet) in the Panama Canal Zone Watershed. Specie…	tropical	South Africa	North America	[1,3]	[Landsat 7,AIRSAR]	[1,2,3]	[1,3]	2000	2004	1	1	alpha	1	1	explorative statistics	[1,2]	[red,nir]	ndvi
Hakkenberg, CR; Zhu, K; Peet, RK; Song, C	Hakkenberg, CR	Mapping multi-scale vascular plant richness in a forest landscape with integrated LiDAR and hyperspectral remote-sensing	2018	WILEY	ECOLOGY	5.499	10.1002/ecy.2109	United States	28	The central role of floristic diversity in maintaining habitat integrity and ecosystem function has propelled efforts to map and monitor its distribution across forest landscapes. While biodiversity studies have traditionally relied largely on ground-based observations, the immensity of the task of generating accurate, repeatable, and spatially-continuous data on biodiversity patterns at large sc…	subtropical	United States	North America	[2,4]	G-LiHT	[1,3]	[1,1]	2013	2013	1	1	alpha	1	1	[RF,GLM,PCA]	[1,3]	[blue,green,red,nir]	[cri1,cri2,ndvi,repi,sri]
Hauser, LT; Feret, JB; Binh, NA; van der Windt, N; Sil, AF; Timmermans, J; Soudzilovskaia, NA; van Bodegom, PM	Hauser, LT	Towards scalable estimation of plant functional diversity from Sentinel-2: In-situ validation in a heterogeneous (semi-)natural landscape	2021	ELSEVIER SCIENCE INC	REMOTE SENSING OF ENVIRONMENT	10.164	10.1016/j.rse.2021.112505	Netherlands	6	Large-scale high-resolution satellite observations of plant functional diversity patterns will greatly benefit our ability to study ecosystem functioning. Here, we demonstrate a potentially scalable approach that uses aggregate plant traits estimated from radiative transfer model (RTM) inversion of Sentinel-2 satellite images to calculate community patterns of plant functional diversity. Trait re…	subtropical	Portugal	Europe	1	Sentinel-2	[2,3]	2	2019	2019	1	1	[alpha,beta]	2	1	[RTM,neural networks,support vector regression,explorative statistics]	2	2	0
Hauser, LT; Timmermans, J; van der Windt, N; Sil, AF; de Sa, NC; Soudzilovskaia, NA; van Bodegom, PM	Hauser, LT	Explaining discrepancies between spectral and in-situ plant diversity in multispectral satellite earth observation	2021	ELSEVIER SCIENCE INC	REMOTE SENSING OF ENVIRONMENT	10.164	10.1016/j.rse.2021.112684	Netherlands	2	In light of the ongoing global biodiversity crisis, the urge to monitor and map terrestrial plant biodiversity at large spatial extents has spurred research on adequate quantitative methods. The use of spectral diversity metrics from different remote sensing platforms has emerged as a promising tool for such biodiversity assessments. Satellite remote sensing presents the next frontier for impleme…	subtropical	Portugal	Europe	[1,5]	[Sentinel-2, SRTM]	[2,3]	[3,3]	2019	2019	1	1	[alpha,beta]	2	1	linear mixed effect models	[2,3]	2	0
He, KS; Zhang, JT; Zhang, QF	He, KS	Linking variability in species composition and MODIS NDVI based on beta diversity measurements	2009	ELSEVIER	ACTA OECOLOGICA-INTERNATIONAL JOURNAL OF ECOLOGY	1.674	10.1016/j.actao.2008.07.006	United States	43	Finding an effective method to quantify species compositional changes in time and space has been an important task for ecologists and biogeographers. Recently, exploring regional floristic patterns using data derived from satellite imagery, such as the normalized difference vegetation index (NDVI) has drawn considerable research interests among ecologists. Studies have shown that NDVI could be a …	subtropical	United States	North America	1	MODIS	[2,3]	4	2005	2005	1	3	beta	2	1	[explorative statistics,Bray-Curtis,Mantel test,PCoA,MRPP]	2	[red,nir]	ndvi
Heidrich, L; Bae, S; Levick, S; Seibold, S; Weisser, W; Krzystek, P; Magdon, P; Nauss, T; Schall, P; Serebryanyk, A; Wollauer, S; Ammer, C; Bassler, C; Doerfler, I; Fischer, M; Gossner, MM; Heurich, M; Hothorn, T; Jung, K; Kreft, H; Schulze, ED; Simons, N; Thorn, S; Muller, J	Heidrich, L	Heterogeneity-diversity relationships differ between and within trophic levels in temperate forests	2020	NATURE PUBLISHING GROUP	NATURE ECOLOGY & EVOLUTION	15.46	10.1038/s41559-020-1245-z	Germany	25	The habitat heterogeneity hypothesis predicts that biodiversity increases with increasing habitat heterogeneity due to greater niche dimensionality. However, recent studies have reported that richness can decrease with high heterogeneity due to stochastic extinctions, creating trade-offs between area and heterogeneity. This suggests that greater complexity in heterogeneity-diversity relationships…	temperate	Germany	Europe	4	ALS	[1,3]	1	2007	2018	1	1	[alpha,beta]	1	3	[explorative statistics,GAM]	1	0	0
Hernandez-Stefanoni, JL; Dupuy, JM; Castillo-Santiago, MA	Hernandez-Stefanoni, JL	Assessing species density and abundance of tropical trees from remotely sensed data and geostatistics	2009	WILEY	APPLIED VEGETATION SCIENCE	3.252	10.1111/j.1654-109X.2009.01044.x	Mexico	9	Question What relationships exist between remotely sensed measurements and field observations of species density and abundance of tree species? Can these relationships and spatial interpolation approaches be used to improve the accuracy of prediction of species density and abundance of tree species? Location Quintana Roo, Yucatan peninsula, Mexico. Methods Spatial prediction of species density an…	tropical	Mexico	North America	1	Landsat 7	[2,3]	3	2000	2000	1	1	alpha	1	1	[explorative statistics,regression kriging]	2	[red,nir,swir]	ndvi
Hernandez-Stefanoni, JL; Gallardo-Cruz, JA; Meave, JA; Rocchini, D; Bello-Pineda, J; Lopez-Martinez, JO	Hernandez-Stefanoni, JL	Modeling alpha- and beta-diversity in a tropical forest from remotely sensed and spatial data	2012	ELSEVIER SCIENCE BV	INTERNATIONAL JOURNAL OF APPLIED EARTH OBSERVATION AND GEOINFORMATION	5.933	10.1016/j.jag.2012.04.002	Mexico	55	Comprehensive information on species distribution and species composition patterns of plant communities is required for effective conservation and management of biodiversity. Remote sensing offers an inexpensive means of attaining complete spatial coverage for large areas, at regular time intervals, and can therefore be extremely useful for estimating both species richness and spatial variation o…	tropical	Mexico	North America	1	Landsat 7	[2,3]	3	2000	2000	1	1	[alpha,beta]	2	1	Regression Kriging	2	[red,nir,swir]	ndvi
Higgins, MA; Asner, GP; Perez, E; Elespuru, N; Tuomisto, H; Ruokolainen, K; Alonso, A	Higgins, MA	Use of Landsat and SRTM Data to Detect Broad-Scale Biodiversity Patterns in Northwestern Amazonia	2012	MDPI AG	REMOTE SENSING	4.848	10.3390/rs4082401	United States	31	Vegetation maps are the starting point for the design of protected areas and regional conservation plans. Accurate vegetation maps are missing for much of Amazonia, preventing the development of effective and compelling conservation strategies. Here we used a network of 160 inventories across northwestern Amazonia to evaluate the use of Landsat and Shuttle Radar Topography Mission (SRTM) data to …	tropical	Peru	South America	[1,5]	[Landsat 5,SRTM]	[2,3]	[3,4]	1987	2000	1	1	[alpha,beta]	2	1	[manual interpretation,Jaccard similarity index,NMDS,linear regressions,CART]	[2,3]	2	ndvi
Hoffmann, S; Schmitt, TM; Chiarucci, A; Irl, SDH; Rocchini, D; Vetaas, OR; Tanase, MA; Mermoz, S; Bouvet, A; Beierkuhnlein, C	Hoffmann, S	Remote sensing of beta-diversity: Evidence from plant communities in a semi-natural system	2019	WILEY	APPLIED VEGETATION SCIENCE	3.252	10.1111/avsc.12403	Germany	18	Question Do remote sensing signals represent beta-diversity? Does beta-diversity agree with community types? Location UNESCO Man and the Biosphere Reserve, La Palma, Canary Islands. Methods We recorded perennial, vascular plant species abundances in 69 plots (10 m x 10 m) in three pre-defined community types along an elevational gradient of 2,400 m: succulent scrubland, Pinus canariensis forest a…	subtropical	Spain	Europe	[1,4]	[Sentinel-2, ALS]	[1,2,3]	[2,3]	2009	2017	1	3	beta	2	1	[GAM,ANOVA,NMDS,k-means clustering,MANOVA,Mantel,PCA]	[1,2,4]	2	[ndvi,msi,psri,acr1,cri1,pri]
Jha, CS; Rakesh; Singhal, J; Reddy, CS; Rajashekar, G; Marty, S; Patnaik, C; Das, A; Misra, A; Singh, CP; Mohapatra, J; Krishnayya, NSR; Kiran, S; Townsend, P; Martinez, MH	Jha, CS	Characterization of species diversity and forest health using AVIRIS-NG hyperspectral remote sensing data	2019	INDIAN ACAD SCIENCES	CURRENT SCIENCE	1.102	10.18520/cs/v116/i7/1124-1135	India	9	Species diversity and vegetation health are two critical components to be monitored for sustainable forest management and conservation of biodiversity. The present study characterizes species dominance and alpha-diversity of a forest for the selected region in Mudumalai Wildlife Sanctuary (MWS), Western Ghats, which represents one of the most economically important forest types in India - the tro…	tropical	India	Asia	2	AVIRIS	[1,3]	1	2016	2016	1	1	alpha	3	1	[PCA,k-means clustering]	1	1	0
Kalacska, M; Sanchez-Azofeifa, GA; Rivard, B; Caelli, T; White, HP; Calvo-Alvarado, JC	Kalacska, M	Ecological fingerprinting of ecosystem succession: Estimating secondary tropical dry forest structure and diversity using imaging spectroscopy	2007	ELSEVIER SCIENCE INC	REMOTE SENSING OF ENVIRONMENT	10.164	10.1016/j.rse.2006.11.007	Canada	103	We evaluated the use of EO-I Hyperion hyperspectral satellite imagery for mapping structure and floristic diversity in a Neotropical tropical dry forest as a way of assessing a region's ecological fingerprint. Analysis of satellite imagery provides a means to spatially appraise the dynamics of the structure and diversity of the forest. We derived optimal models for mapping canopy height, live abo…	tropical	Costa Rica	North America	2	Hyperion	[2,3]	3	2002	2003	1	2	alpha	1	1	[Multiple Regression, Generalized Neural Network Regression]	2	1	[ndvi,ndvi_canopy,sri_705,sri_canopy,msr,csi]
Kamoske, AG; Dahlin, KM; Read, QD; Record, S; Stark, SC; Serbin, SP; Zarnetske, PL	Kamoske, AG	Towards mapping biodiversity from above: Can fusing lidar and hyperspectral remote sensing predict taxonomic, functional, and phylogenetic tree diversity in temperate forests?	2022	WILEY	GLOBAL ECOLOGY AND BIOGEOGRAPHY	7.144	10.1111/geb.13516	United States	0	Aim Rapid global change is impacting the diversity of tree species and essential ecosystem functions and services of forests. It is therefore critical to understand and predict how the diversity of tree species is spatially distributed within and among forest biomes. Satellite remote sensing platforms have been used for decades to map forest structure and function but are limited in their capacit…	temperate	United States	North America	[2,4]	NEON	[1,3]	[1,1]	2018	2018	1	1	alpha	2	1	[linear mixed effect models,explorative statistics]	1	1	ndvi
Khare, S; Latifi, H; Ghosh, SK	Khare, S	Multi-scale assessment of invasive plant species diversity using Pleiades 1A, RapidEye and Landsat-8 data	2018	TAYLOR & FRANCIS LTD	GEOCARTO INTERNATIONAL	4.889	10.1080/10106049.2017.1289562	India	16	We used a full remote sensing-based approach to assess plant species diversity in large and inaccessible areas affected by Lantana camara L., a common invasive species within the deciduous forests of Western Himalayan region of India, using spectral heterogeneity information extracted from optical data. The spread of L. camara was precisely mapped by Pleiades 1A data, followed by comparing Pleiad…	subtropical	India	Asia	[1,1,1]	[Pléiades, RapidEye, Landsat 8]	[2,3]	[1,2,3]	2013	2013	1	1	alpha	2	1	[OBIA,species diversity curves]	2	[blue,green,red,red edge,nir]	ndvi
Khare, S; Latifi, H; Rossi, S	Khare, S	Forest beta-diversity analysis by remote sensing: How scale and sensors affect the Rao's Q index	2019	ELSEVIER	ECOLOGICAL INDICATORS	4.958	10.1016/j.ecolind.2019.105520	Canada	14	Space-borne remote sensing missions provide robust, timely and continuous data to assess biodiversity in remote or protected areas, where direct field observations can be prohibited by difficult accessibility. The objective of this study was to extend the concept of remote sensing based assessment of beta-diversity to multi-scale domain by multi-resolution optical satellite data. This study was c…	subtropical	India	Asia	[1,1,1]	[Pléiades, RapidEye, Landsat 8]	[2,3]	[1,2,3]	2013	2013	1	1	[alpha,beta]	2	1	[Shannon, Rao]	2	[blue,green,red,nir]	ndvi
Khare, S; Latifi, H; Rossi, S	Khare, S	A 15-year spatio-temporal analysis of plant beta-diversity using Landsat time series derived Rao's Q index	2021	ELSEVIER	ECOLOGICAL INDICATORS	4.958	10.1016/j.ecolind.2020.107105	Canada	3	Understanding temporal dynamics of plant biodiversity is crucial for conservation strategies at regional and local levels. The mostly applied hitherto methods are based on field observations of the plant communities and the related taxa. Satellite earth observation time series offer continuous and wider coverage for the assessment of plant diversity, especially in remote areas. Theoretical basis …	subtropical	India	Asia	1	Landsat 7	[2,3]	3	2000	2015	1	3	beta	2	1	Rao	2	[red,nir]	[ndvi,msavi]
Krishnaswamy, J; Bawa, KS; Ganeshaiah, KN; Kiran, MC	Krishnaswamy, J	Quantifying and mapping biodiversity and ecosystem services: Utility of a multi-season NDVI based Mahalanobis distance surrogate	2009	ELSEVIER SCIENCE INC	REMOTE SENSING OF ENVIRONMENT	10.164	10.1016/j.rse.2008.12.011	India	89	There is an urgent need for techniques to rapidly and periodically measure biodiversity and ecosystem services over large landscapes. Conventional vegetation classification and mapping approaches are based on discrete arbitrary classes which do not capture gradual changes in forest type (and corresponding biodiversity and ecosystem services values) from site to site. We developed a simple multi-d…	tropical	India	Asia	[1,1]	[Resourcesat-1 LISS-III, Resourcesat-1 AWiFS]	[2,3]	[3,4]	1998	2003	1	2	beta	2	1	[Mahalanobis distance,linear regression,quantile-quantile plots,Mantel test]	2	[red,nir]	ndvi
Laliberte, E; Schweiger, AK; Legendre, P	Laliberte, E	Partitioning plant spectral diversity into alpha and beta components	2020	WILEY	ECOLOGY LETTERS	9.492	10.1111/ele.13429	Canada	31	Plant spectral diversity - how plants differentially interact with solar radiation - is an integrator of plant chemical, structural, and taxonomic diversity that can be remotely sensed. We propose to measure spectral diversity as spectral variance, which allows the partitioning of the spectral diversity of a region, called spectral gamma (gamma) diversity, into additive alpha (alpha; within commu…	temperate	United States	North America	2	NEON	1	1	2017	2017	0	1	[alpha,beta]	2	1	[PCA, sum of squares partitioning]	1	1	ndvi
Levin, N; Shmida, A; Levanoni, O; Tamari, H; Kark, S	Levin, N	Predicting mountain plant richness and rarity from space using satellite-derived vegetation indices	2007	WILEY	DIVERSITY AND DISTRIBUTIONS	5.139	10.1111/j.1472-4642.2007.00372.x	Israel	133	Can species richness and rarity be predicted from space? If satellite-derived vegetation indices can provide us with accurate predictions of richness and rarity in an area, they can serve as an excellent tool in diversity and conservation research, especially in inaccessible areas. The increasing availability of high-resolution satellite images is enabling us to study this question more carefully…	subtropical	Israel	Asia	[1,1,1]	[Quickbird, ASTER, Landsat 7]	[2,3,3]	[1,2,3]	1999	2004	1	2	alpha	2	1	explorative statistics	2	[red,nir]	[ndvi,savi]
Lucas, KL; Carter, GA	Lucas, KL	The use of hyperspectral remote sensing to assess vascular plant species richness on Horn Island, Mississippi	2008	ELSEVIER SCIENCE INC	REMOTE SENSING OF ENVIRONMENT	10.164	10.1016/j.rse.2008.06.009	United States	56	Relationships of plant species richness with spectral indices derived from airborne hyperspectral image data were evaluated for several habitat-types on Horn Island, Mississippi, northern Gulf of Mexico. A 126-band hyperspectral data cube of Horn Island acquired by the HyMap imaging system covered the 450-2500 nm spectrum at a 3 m Ground Sample Distance (GSD). Reflectance spectra were extracted f…	subtropical	United States	North America	2	HyMap	[1,3]	1	2003	2003	1	1	alpha	2	1	explorative statistics	1	1	0
Mackey, B; Berry, S; Hugh, S; Ferrier, S; Harwood, TD; Williams, KJ	Mackey, B	Ecosystem greenspots: identifying potential drought, fire, and climate-change micro-refuges	2012	WILEY	ECOLOGICAL APPLICATIONS	4.657	10.1890/11-1479.1	Australia	77	In response to climate change and other threatening processes there is renewed interest in the role of refugia and refuges. In bioregions that experience drought and fire, micro-refuges can play a vital role in ensuring the persistence of species. We develop and apply an approach to identifying potential micro-refuges based on a time series of remotely sensed vegetation greenness (fraction of pho…	subtropical	Australia	Australia and Oceania	1	MODIS	[2,3]	4	2000	2010	1	3	alpha	2	1	explorative statistics	2	[red,nir]	[ndvi,fPAR]
Madonsela, S; Cho, MA; Mathieu, R; Mutanga, O; Ramoelo, A; Kaszta, Z; Van de Kerchove, R; Wolff, E	Madonsela, S	Multi-phenology WorldView-2 imagery improves remote sensing of savannah tree species	2017	ELSEVIER SCIENCE BV	INTERNATIONAL JOURNAL OF APPLIED EARTH OBSERVATION AND GEOINFORMATION	5.933	10.1016/j.jag.2017.01.018	South Africa	55	Biodiversity mapping in African savannah is important for monitoring changes and ensuring sustainable use of ecosystem resources. Biodiversity mapping can benefit from multi-spectral instruments such as WorldView-2 with very high spatial resolution and a spectral configuration encompassing important spectral regions not previously available for vegetation mapping. This study investigated i) the b…	subtropical	South Africa	Africa	1	WorldView-2	[2,3]	1	2012	2013	1	2	alpha	2	1	Spectral Angle Mapper	2	[coastal blue,blue,green,yellow,red,re-edge,NIR1,NIR2]	0
Madonsela, S; Cho, MA; Ramoelo, A; Mutanga, O	Madonsela, S	Remote sensing of species diversity using Landsat 8 spectral variables	2017	ELSEVIER	ISPRS JOURNAL OF PHOTOGRAMMETRY AND REMOTE SENSING	8.979	10.1016/j.isprsjprs.2017.10.008	South Africa	40	The application of remote sensing in biodiversity estimation has largely relied on the Normalized Difference Vegetation Index (NDVI). The NDVI exploits spectral information from red and near infrared bands of Landsat images and it does not consider canopy background conditions hence it is affected by soil brightness which lowers its sensitivity to vegetation. As such NDVI may be insufficient in e…	subtropical	South Africa	Africa	1	Landsat 8	[2,3]	3	2016	2016	1	1	alpha	2	1	explorative statistics	2	2	[ndvi,evi,sri,savi]
Madonsela, S; Cho, MA; Ramoelo, A; Mutanga, O	Madonsela, S	Investigating the Relationship between Tree Species Diversity and Landsat-8 Spectral Heterogeneity across Multiple Phenological Stages	2021	MDPI	REMOTE SENSING	4.848	10.3390/rs13132467	South Africa	1	The emergence of the spectral variation hypothesis (SVH) has gained widespread attention in the remote sensing community as a method for deriving biodiversity information from remotely sensed data. SVH states that spectral heterogeneity on remotely sensed imagery reflects environmental heterogeneity, which in turn is associated with high species diversity and, therefore, could be useful for chara…	subtropical	South Africa	Africa	1	Landsat 8	[2,3]	3	2016	2016	1	2	alpha	2	1	linear regression	2	2	0
Maeda, EE; Heiskanen, J; Thijs, KW; Pellikka, PKE	Maeda, EE	Season-dependence of remote sensing indicators of tree species diversity	2014	TAYLOR & FRANCIS LTD	REMOTE SENSING LETTERS	2.583	10.1080/2150704X.2014.912767	Finland	13	During recent years, many studies have been undertaken to investigate how spectral characteristics of forests can provide information on spatial patterns of tree species diversity (TSD). Important advances have been made, and significant relationships between TSD and remotely sensed indicators of net primary productivity and environmental heterogeneity have been reported. However, the season-depe…	tropical	Kenya	Africa	[1,1]	[Landsat 5, Landsat 7]	[2,3]	3	2008	2011	1	3	alpha	1	1	[least squares linear regression,t-test]	2	2	[tasseled cap,dvi,Mref,ndvi]
Mapfumo, RB; Murwira, A; Masocha, M; Andriani, R	Mapfumo, RB	The relationship between satellite-derived indices and species diversity across African savanna ecosystems	2016	ELSEVIER SCIENCE BV	INTERNATIONAL JOURNAL OF APPLIED EARTH OBSERVATION AND GEOINFORMATION	5.933	10.1016/j.jag.2016.06.025	Zimbabwe	13	The ability to use remotely sensed diversity is important for the management of ecosystems at large spatial extents. However, to achieve this, there is still need to develop robust methods and approaches that enable large-scale mapping of species diversity. In this study, we tested the relationship between species diversity measured in situ with the Normalized Difference Vegetation Index (NDVI) a…	tropical	[Zimbabwe,Zambia,Mozambique]	Africa	[1,1]	[Landsat 8,WorldView-2]	[2,3]	[2,1]	2012	2013	1	2	alpha	2	1	[linear and non-linear regression,Kolmogorov-Smirnox test,ANOVA,t-test]	2	[red,nir]	ndvi
Mensah, AA; Petersson, H; Saarela, S; Goude, M; Holmstrom, E	Mensah, AA	Using heterogeneity indices to adjust basal area - Leaf area index relationship in managed coniferous stands	2020	ELSEVIER	FOREST ECOLOGY AND MANAGEMENT	3.558	10.1016/j.foreco.2019.117699	Sweden	0	The structure of contemporary managed forests is complex and deviates from experimental forests which are usually even-aged monocultures and single-storied. To apply theoretical growth and yield functions on managed forests, adjustments are required, especially for leaf area index (LAI) which is a key biophysical variable in process-based growth models. To asses this, the performance of canopy LA…	temperate	Sweden	Europe	1	Sentinel-2	[2,3]	2	2016	2017	1	3	alpha	2	1	[descriptive statistics,non-linear least squares regression,generalized additive models]	[2,5]	[green,red,red edge,nir]	[ndvi red edge,ndvi chlorophyll-red edge,chlorophyll-green,simple ratio red edge-red,ndvi-green,ndvi,savi]
Mohapatra, J; Singh, CP; Hamid, M; Khuroo, AA; Malik, AH; Pandya, HA	Mohapatra, J	Assessment of the alpine plant species biodiversity in the western Himalaya using Resourcesat-2 imagery and field survey	2019	INDIAN ACAD SCIENCES	JOURNAL OF EARTH SYSTEM SCIENCE	1.371	10.1007/s12040-019-1219-1	India	2	In the alpine ecosystem of the Himalaya, an observation of species diversity with habitat heterogeneity predicts some important factors that govern them. Information theory-based species biodiversity at the community level and habitat heterogeneity at the landscape level were studied. Resourcesat-2 linear imaging self-scanning sensor (LISS-III and LISS-IV)-based spectral diversity indices and spe…	temperate	India	Asia	[1,1]	[Resourcesat-2 LISS-III, Resourcesat-2 LISS-IV]	[2,3]	[3,2]	2014	2015	1	1	alpha	1	1	[Indices,Species-Area relationship]	2	[red,nir]	ndvi
Mpakairi, KS; Dube, T; Dondofema, F; Dalu, T	Mpakairi, KS	Spatio-temporal variation of vegetation heterogeneity in groundwater dependent ecosystems within arid environments	2022	ELSEVIER	ECOLOGICAL INFORMATICS	3.142	10.1016/j.ecoinf.2022.101667	South Africa	0	Climate change, land cover change and the over-abstraction of groundwater threaten the existence of Groundwater-Dependent Ecosystems (GDE), despite these environments being regarded as biodiversity hotspots. The vegetation heterogeneity in GDEs requires routine monitoring in order to conserve and preserve the ecosystem services in these environments. However, in-situ monitoring of vegetation hete…	subtropical	[South Africa,Botswana]	Africa	1	Sentinel-2	[2,3]	3	2021	2021	1	1	[alpha,beta]	2	1	[Rao,regression models]	2	2	[evi,evi2,msavi2,ndvi,ndpi,osavi,savi,sri,rdvi,tasseled cap]
Muro, J; Van Doninck, J; Tuomisto, H; Higgins, MA; Moulatlet, GM; Ruokolainen, K	Muro, J	Floristic composition and across-track reflectance gradient in Landsat images over Amazonian forests	2016	ELSEVIER SCIENCE BV	ISPRS JOURNAL OF PHOTOGRAMMETRY AND REMOTE SENSING	8.979	10.1016/j.isprsjprs.2016.06.016	Finland	11	Remotely sensed image interpretation or classification of tropical forests can be severely hampered by the effects of the bidirectional reflection distribution function (BRDF). Even for narrow swath sensors like Landsat TM/ETM+, the influence of reflectance anisotropy can be sufficiently strong to introduce a cross track reflectance gradient. If the BRDF could be assumed to be linear for the limi…	tropical	[Peru,Brazil]	South America	[1,1]	[Landsat 5,Landsat 7]	[2,3]	[3,3]	1987	2011	1	3	[alpha,beta]	2	1	[NMDS,cubic regression,segmentation]	2	2	0
Nagendra, H; Rocchini, D; Ghate, R; Sharma, B; Pareeth, S	Nagendra, H	Assessing Plant Diversity in a Dry Tropical Forest: Comparing the Utility of Landsat and Ikonos Satellite Images	2010	MDPI	REMOTE SENSING	4.848	10.3390/rs2020478	India	77	While high expectations have been raised about the utility of high resolution satellite imagery for biodiversity assessment, there has been almost no empirical assessment of its use, particularly in the biodiverse tropics which represent a very challenging environment for such assessment challenge. This research evaluates the use of high spatial resolution (IKONOS) and medium spatial resolution (…	subtropical	India	Asia	[1,1]	[Landsat 7, IKONOS]	[2,3]	[3,1]	2000	2001	1	1	alpha	1	1	explorative statistics	2	2	[tasseled cap,ndvi,iri,miri]
Oindo, BO; Skidmore, AK	Oindo, BO	Interannual variability of NDVI and species richness in Kenya	2002	TAYLOR & FRANCIS LTD	INTERNATIONAL JOURNAL OF REMOTE SENSING	3.151	10.1080/01431160010014819	Netherlands	130	Ecologists have long recognized the spatial variability of species richness. In an attempt to identify the factors responsible for this variability, ecologists have traditionally used environmental data obtained from sparse point samples (such as meteorological stations). However, remotely sensed data also provide a means of estimating relevant environmental factors and thereby improving predicti…	tropical	Kenya	Africa	1	AVHRR	[1,2,3]	4	1982	1992	1	3	alpha	2	3	explorative statistics	2	[red,nir]	ndvi
Oindo, BO	Oindo, BO	Patterns of herbivore species richness in Kenya and current ecoclimatic stability	2002	SPRINGER	BIODIVERSITY AND CONSERVATION	3.549	10.1023/A:1016077615170	Netherlands	12	The increased attention to biodiversity worldwide has stimulated interest in understanding biophysical factors associated with indicators of biodiversity such as species richness. Although levels of biodiversity may seem to be equivalent in different areas, high species richness may be caused by accumulation of species over a long time in places where environmental conditions remained stable and …	tropical	Kenya	Africa	1	AVHRR	[1,2]	4	1982	1993	0	3	alpha	2	2	explorative statistics	2	[red,nir]	ndvi
Parviainen, M; Luoto, M; Heikkinen, RK	Parviainen, M	The role of local and landscape level measures of greenness in modelling boreal plant species richness	2009	ELSEVIER SCIENCE BV	ECOLOGICAL MODELLING	2.974	10.1016/j.ecolmodel.2009.07.017	Finland	26	Measurements of primary productivity and its heterogeneity based on satellite images can provide useful estimates of species richness and distribution patterns. However, species richness at a given site may depend not only on local habitat quality and productivity but also on the characteristics of the surrounding landscape. In this study we investigated whether the predictions of species richnes…	temperate	Finland	Europe	1	Landsat 7	[2,3]	3	2000	2000	1	1	alpha	1	1	[GAM,Spearman's correlation]	2	[red,nir]	ndvi
Pau, S; Gillespie, TW; Wolkovich, EM	Pau, S	Dissecting NDVI-species richness relationships in Hawaiian dry forests	2012	WILEY-BLACKWELL	JOURNAL OF BIOGEOGRAPHY	4.324	10.1111/j.1365-2699.2012.02731.x	United States	38	Aim A growing body of research has used the normalized difference vegetation index (NDVI) as a proxy for productivity to predict species richness. Yet the mechanisms that produce the relationship between NDVI and species richness remain unclear because of correlated biotic and abiotic factors that influence NDVI. In this study we investigated different biotic and abiotic effects that potentially …	subtropical	United States	North America	1	MODIS	[2,3]	4	2000	2009	1	3	alpha	2	1	[explorative statistics,structural equation models]	2	[blue,red,nir]	[ndvi,evi]
Paz-Kagan, T; Caras, T; Herrmann, I; Shachak, M; Karnieli, A	Paz-Kagan, T	Multiscale mapping of species diversity under changed land use using imaging spectroscopy	2017	WILEY	ECOLOGICAL APPLICATIONS	4.657	10.1002/eap.1540	Israel	11	Land use changes are one of the most important factors causing environmental transformations and species diversity alterations. The aim of the current study was to develop a geoinformatics-based framework to quantify alpha and beta diversity indices in two sites in Israel with different land uses, i.e., an agricultural system of fruit orchards, an afforestation system of planted groves, and an un…	subtropical	Israel	Asia	2	AisaFENIX	[1,3]	1	2014	2014	1	1	[alpha,beta]	2	1	[SVM,ANOVA,Tucker test]	1	1	ndvi
Paz-Kagan, T; Chang, JG; Shoshany, M; Sternberg, M; Karnieli, A	Paz-Kagan, T	Assessment of plant species distribution and diversity along a climatic gradient from Mediterranean woodlands to semi-arid shrublands	2021	TAYLOR & FRANCIS LTD	GISCIENCE & REMOTE SENSING	6.238	10.1080/15481603.2021.1953770	Israel	1	Climate and land-use change profoundly affect plant species distribution (SD) and composition, and the impact of these processes is expected to increase in the coming years. As a proxy of global changes, knowledge of SD and diversity along climatic gradients is essential to determine the efforts needed for species conservation. Plant spectral diversity is an emerging approach used as a proxy for …	subtropical	Israel	Asia	[2,1]	[AisaFENIX,Landsat 8]	[1,3]	[1,3]	2017	2017	1	1	alpha	2	1	[SVM,ANOVA,Tucker test]	[1,2]	[1,TIR]	ndvi
Ribeiro, I; Proenca, V; Serra, P; Palma, J; Domingo-Marimon, C; Pons, X; Domingos, T	Ribeiro, I	Remotely sensed indicators and open-access biodiversity data to assess bird diversity patterns in Mediterranean rural landscapes	2019	NATURE RESEARCH	SCIENTIFIC REPORTS	4.379	10.1038/s41598-019-43330-3	Portugal	3	Biodiversity monitoring at simultaneously fine spatial resolutions and large spatial extents is needed but limited by operational trade-offs and costs. Open-access data may be cost-effective to address those limitations. We test the use of open-access satellite imagery (NDVI texture variables) and biodiversity data, assembled from GBIF, to investigate the relative importance of variables of habit…	subtropical	Portugal	Europe	1	Landsat 5	[2,3]	3	2010	2011	1	2	alpha	2	2	[GLM,GDM,Spearman rho,Moran's I]	[2,3,4]	[red,nir]	ndvi
Rocchini, D	Rocchini, D	Distance decay in spectral space in analysing ecosystem beta-diversity	2007	TAYLOR & FRANCIS LTD	INTERNATIONAL JOURNAL OF REMOTE SENSING	3.151	10.1080/01431160600954712	Italy	38	The use of spectral distance for explaining the phenomenon of distance decay in species similarity between two sites (based on the niche difference model) is presented here. Distance decay is based on the first law of geography: 'the similarity between two sites decays with increasing the distance between them'. From an ecological point of view, this could be expressed as: 'the beta-diversity bet…	subtropical	Italy	Europe	1	Landsat 7	[2,3]	3	2000	2000	1	1	beta	2	1	[distance decay model, boundary line method]	2	nir	0
Rocchini, D; Cade, BS	Rocchini, D	Quantile Regression Applied to Spectral Distance Decay	2008	IEEE-INST ELECTRICAL ELECTRONICS ENGINEERS INC	IEEE GEOSCIENCE AND REMOTE SENSING LETTERS	3.966	10.1109/LGRS.2008.2001767	Italy	18	Remotely sensed imagery has long been recognized as a powerful support for characterizing and estimating biodiversity. Spectral distance among sites has proven to be a powerful approach for detecting species composition variability. Regression analysis of species similarity versus spectral distance allows us to quantitatively estimate the amount of turnover in species composition with respect to …	subtropical	Italy	Europe	1	Landsat 7	[2,3]	3	2000	2000	1	1	beta	2	1	[distance decay,OLS,quantile regression]	2	2	0
Rocchini, D; Wohlgemuth, T; Ghisleni, S; Chiarucci, A	Rocchini, D	Spectral rarefaction: linking ecological variability and plant species diversity	2008	AKADEMIAI KIADO RT	COMMUNITY ECOLOGY	1.185	10.1556/ComEc.9.2008.2.5	Italy	4	Species rarefaction curves have long been used for estimating the expected number of species as a function of sampling effort and they represent a powerful tool for quantifying the diversity of an area from local (alpha- diversity) to regional scale (beta- and gamma-diversity). Nonetheless, sampling species based on standard plant inventories represents a cost expensive approach. In this view, re…	temperate	Switzerland	Europe	1	Landsat 7	[2,3]	3	1999	2001	1	1	[alpha,beta]	2	1	[spectral rarefaction,species rarefaction,correlation analysis]	2	2	0
Rocchini, D; Nagendra, H; Ghate, R; Cade, BS	Rocchini, D	Spectral Distance Decay: Assessing Species Beta-diversity by Quantile Regression	2009	AMER SOC PHOTOGRAMMETRY	PHOTOGRAMMETRIC ENGINEERING AND REMOTE SENSING	1.083	10.14358/PERS.75.10.1225	Italy	11	Remotely sensed data represents key information for characterizing and estimating biodiversity. Spectral distance among sites has proven to be a powerful approach for detecting species composition variability. Regression analysis of species similarity versus spectral distance may allow us to quantitatively estimate how beta-diversity in species changes with respect to spectral and ecological vari…	tropical	India	Asia	1	Landsat 7	[2,3]	3	2001	2001	1	1	beta	2	1	[distance decay,OLS,quantile regression]	2	2	0
Rocchini, D; He, KS; Zhang, JT	Rocchini, D	Is spectral distance a proxy of beta diversity at different taxonomic ranks? A test using quantile regression	2009	ELSEVIER SCIENCE BV	ECOLOGICAL INFORMATICS	3.142	10.1016/j.ecoinf.2009.07.001	Italy	7	Beta diversity represents a powerful indicator of ecological conditions because of its intrinsic relation with environmental gradients. In this view, remote sensing may be profitably used to derive models characterizing or estimating species turnover over an area. While several examples exist using spectral variability to estimate species diversity at several spatial scales, most of these have re…	subtropical	United States	North America	1	MODIS	[2,3]	4	2005	2005	1	3	beta	2	1	[OLS,quantile regression]	2	[red,nir]	ndvi
Rocchini, D; Wohlgemuth, T; Ricotta, C; Ghisleni, S; Stefanini, A; Chiarucci, A	Rocchini, D	Rarefaction theory applied to satellite imagery for relating spectral and species diversity	2009	ASSOC ITALIANA TELERILEVAMENTO	RIVISTA ITALIANA DI TELERILEVAMENTO	999999	999999	Italy	3	Species rarefaction curves have long been used for estimating the expected number of species as a function of sampling effort. Nonetheless, sampling species based on standard plant inventories represents a cost expensive approach. In this view, remotely sensed information may be straightforwardly used for predicting species rich sites on the strength of the Spectral Variation Plypothesis which pr…	temperate	Switzerland	Europe	1	Landsat 7	[2,3]	3	1999	2001	1	1	[alpha,beta]	2	1	[spectral rarefaction,species rarefaction,correlation analysis]	2	2	0
Rocchini, D; Vannini, A	Rocchini, D	What is up? Testing spectral heterogeneity versus NDVI relationship using quantile regression	2010	TAYLOR & FRANCIS LTD	INTERNATIONAL JOURNAL OF REMOTE SENSING	3.151	10.1080/01431160903085651	Italy	8	Environmental diversity and net primary productivity (NPP) are powerful indicators of local plant species richness (alpha-diversity). Remote sensing proxies of environmental diversity, such as spectral heterogeneity and NPP, are often used in modelling species richness variability, usually through regression analysis. As multicollinearity may affect analysis of species diversity, the interdepende…	subtropical	Italy	Europe	1	Landsat 7	2	3	2000	2000	0	1	beta	2	1	[quantile regression,OLS]	2	2	ndvi
Rocchini, D; McGlinn, D; Ricotta, C; Neteler, M; Wohlgemuth, T	Rocchini, D	Landscape complexity and spatial scale influence the relationship between remotely sensed spectral diversity and survey-based plant species richness	2011	WILEY-BLACKWELL	JOURNAL OF VEGETATION SCIENCE	2.685	10.1111/j.1654-1103.2010.01250.x	Italy	27	Questions: Species rarefaction curves have long been used for estimating the expected number of species as a function of sampling effort. Nonetheless, sampling species based on standard plant inventories represents an effort-intensive approach. Hence, rarefaction based on remotely sensed information can provide a rapid tool for identifying regions with exceptional richness and turnover. The aim o…	temperate	Switzerland	Europe	1	Landsat 7	[2,3]	3	1999	2001	1	1	[alpha,beta]	2	1	[spectral rarefaction,species rarefaction,correlation analysis]	2	2	0
Rocchini, D; Neteler, M	Rocchini, D	Spectral rank-abundance for measuring landscape diversity	2012	TAYLOR & FRANCIS LTD	INTERNATIONAL JOURNAL OF REMOTE SENSING	3.151	10.1080/01431161.2011.648286	Italy	11	Investigation of the diversity of a landscape implies finding appropriate measures coupling information on richness and equitability. Most of the papers dealing with remotely sensed images have relied on the richness of digital numbers (DNs) or on Shannon entropy or Pielou evenness indices for measuring their heterogeneity. Instead, based on ecological theory, we will show that rank-abundance dia…	subtropical	Italy	Europe	1	Landsat 7	2	3	2000	2000	0	1	alpha	2	1	spectral rank-abundance	2	2	0
Rocchini, D; Dadalt, L; Delucchi, L; Neteler, M; Palmer, MW	Rocchini, D	Disentangling the role of remotely sensed spectral heterogeneity as a proxy for North American plant species richness	2014	AKADEMIAI KIADO RT	COMMUNITY ECOLOGY	1.185	10.1556/COMEC.15.2014.1.4	Italy	16	Due to the difficulties of field-based species data collection at wide spatial scales, remotely sensed spectral diversity has been advocated as one of the most effective proxies of ecosystem and species diversity. It is widely accepted that the relationship between species and spectral diversity is scale dependent. However, few studies have evaluated the impacts of scale on species diversity esti…	temperate	North-America	North America	1	MODIS	[2,3]	4	2010	2010	1	1	alpha	1	1	variance partitioning	2	[red,nir]	ndvi
Rocchini, D; Marcantonio, M; Ricotta, C	Rocchini, D	Measuring Rao's Q diversity index from remote sensing: An open source solution	2017	ELSEVIER	ECOLOGICAL INDICATORS	4.958	10.1016/j.ecolind.2016.07.039	Italy	32	Measuring biodiversity is a key issue in ecology to guarantee effective indicators of ecosystem health at different spatial and time scales. However, estimating biodiversity from field observations might present difficulties related to costs and time needed. Moreover, a continuous data update for biodiversity monitoring purposes might be prohibitive. From this point of view, remote sensing repres…	temperate	Europe	Europe	1	MODIS	2	4	2015	2015	0	1	beta	2	1	Rao	2	[red,nir]	ndvi
Rocchini, D; Luque, S; Pettorelli, N; Bastin, L; Doktor, D; Faedi, N; Feilhauer, H; Feret, JB; Foody, GM; Gavish, Y; Godinho, S; Kunin, WE; Lausch, A; Leitao, PJ; Marcantonio, M; Neteler, M; Ricotta, C; Schmidtlein, S; Vihervaara, P; Wegmann, M; Nagendra, H	Rocchini, D	Measuring beta-diversity by remote sensing: A challenge for biodiversity monitoring	2018	WILEY	METHODS IN ECOLOGY AND EVOLUTION	7.781	10.1111/2041-210X.12941	Italy	49	1. Biodiversity includes multiscalar and multitemporal structures and processes, with different levels of functional organization, from genetic to ecosystemic levels. One of the mostly used methods to infer biodiversity is based on taxonomic approaches and community ecology theories. However, gathering extensive data in the field is difficult due to logistic problems, especially when aiming at mo…	subtropical	Portugal	Europe	1	Sentinel-2	2	2	2016	2016	0	1	[alpha,beta]	2	1	Rao	2	[red,nir]	ndvi
Rocchini, D; Bacaro, G; Chirici, G; Da Re, D; Feilhauer, H; Foody, GM; Galluzzi, M; Garzon-Lopez, CX; Gillespie, TW; He, KS; Lenoir, J; Marcantonio, M; Nagendra, H; Ricotta, C; Rommel, E; Schmidtlein, S; Skidmore, AK; Van De Kerchove, R; Wegmann, M; Rugani, B	Rocchini, D	Remotely sensed spatial heterogeneity as an exploratory tool for taxonomic and functional diversity study	2018	ELSEVIER SCIENCE BV	ECOLOGICAL INDICATORS	4.958	10.1016/j.ecolind.2017.09.055	Italy	22	Assessing biodiversity from field-based data is difficult for a number of practical reasons: (i) establishing the total number of sampling units to be investigated and the sampling design (e.g. systematic, random, stratified) can be difficult; (ii) the choice of the sampling design can affect the results; and (iii) defining the focal population of interest can be challenging. Satellite remote sen…	temperate	Europe	Europe	1	MODIS	2	4	2000	2016	0	3	beta	2	1	Rao	2	[red,nir]	ndvi
Rocchini, D; Marcantonio, M; Da Re, D; Chirici, G; Galluzzi, M; Lenoir, J; Ricotta, C; Torresani, M; Ziv, G	Rocchini, D	Time-lapsing biodiversity: An open source method for measuring diversity changes by remote sensing	2019	ELSEVIER SCIENCE INC	REMOTE SENSING OF ENVIRONMENT	10.164	10.1016/j.rse.2019.05.011	Italy	24	Understanding biodiversity changes in time is crucial to promptly provide management practices against diversity loss. This is overall true when considering global scales, since human-induced global change is expected to make significant changes on the Earth's biota. Biodiversity management and planning is mainly based on field observations related to community diversity, considering different ta…	subtropical	Italy	Europe	1	MODIS	2	4	2000	2016	0	3	beta	2	1	Rao	2	[red,nir]	ndvi
Rocchini, D; Salvatori, N; Beierkuhnlein, C; Chiarucci, A; de Boissieu, F; Forster, M; Garzon-Lopez, CX; Gillespie, TW; Hauffe, HC; He, KS; Kleinschmit, B; Lenoir, J; Malavasi, M; Moudry, V; Nagendra, H; Payne, D; Simova, P; Torresani, M; Wegmann, M; Feret, JB	Rocchini, D	From local spectral species to global spectral communities: A benchmark for ecosystem diversity estimate by remote sensing	2021	ELSEVIER	ECOLOGICAL INFORMATICS	3.142	10.1016/j.ecoinf.2020.101195	Italy	7	In the light of unprecedented change in global biodiversity, real-time and accurate ecosystem and biodiversity assessments are becoming increasingly essential. Nevertheless, estimation of biodiversity using ecological field data can be difficult for several reasons. For instance, for very large areas, it is challenging to collect data that provide reliable information. Some of these restrictions …	temperate	Europe	Europe	1	MODIS	2	4	2018	2018	0	3	[alpha,beta]	3	1	spectral species concept	2	[red,nir]	ndvi
Rocchini, D; Marcantonio, M; Da Re, D; Bacaro, G; Feoli, E; Foody, GM; Furrer, R; Harrigan, RJ; Kleijn, D; Iannacito, M; Lenoir, J; Lin, MX; Malavasi, M; Marchetto, E; Meyer, RS; Moudry, V; Schneider, FD; Simova, P; Thornhill, AH; Thouverai, E; Vicario, S; Wayne, RK; Ricotta, C	Rocchini, D	From zero to infinity: Minimum to maximum diversity of the planet by spatio-parametric Rao's quadratic entropy	2021	WILEY	GLOBAL ECOLOGY AND BIOGEOGRAPHY	7.144	10.1111/geb.13270	Italy	4	Aim The majority of work done to gather information on the Earth's biodiversity has been carried out using in-situ data, with known issues related to epistemology (e.g., species determination and taxonomy), spatial uncertainty, logistics (time and costs), among others. An alternative way to gather information about spatial ecosystem variability is the use of satellite remote sensing. It works as …	subtropical	United States	North America	1	Sentinel-2	2	2	2017	2018	0	3	beta	2	1	Rao	2	[red,nir]	ndvi
Schafer, E; Heiskanen, J; Heikinheimo, V; Pellikka, P	Schafer, E	Mapping tree species diversity of a tropical montane forest by unsupervised clustering of airborne imaging spectroscopy data	2016	ELSEVIER	ECOLOGICAL INDICATORS	4.958	10.1016/j.ecolind.2015.12.026	Finland	44	With the ongoing global biodiversity loss, approaches to measuring and monitoring biodiversity are necessary for effective conservation planning, especially in tropical forests. Remote sensing has much potential for biodiversity mapping, and high spatial resolution imaging spectroscopy (IS) allows for direct prediction of tree species diversity based on spectral reflectance. The objective of this…	subtropical	Kenya	Africa	2	AisaEAGLE	[1,3]	1	2013	2013	1	1	alpha	3	1	[MNF transformation,segmentation,clustering]	1	1	0
Schmidtlein, S; Fassnacht, FE	Schmidtlein, S	The spectral variability hypothesis does not hold across landscapes	2017	ELSEVIER SCIENCE INC	REMOTE SENSING OF ENVIRONMENT	10.164	10.1016/j.rse.2017.01.036	Germany	33	One of the biodiversity metrics to track from space is the spatial variability in reflectance that has previously been proposed as a proxy of species counts per unit area. The corresponding hypothesis is known as the spectral variability hypothesis (SVH). Little attention has been paid so far to the questions whether the SVH holds over broader regions and across time. Here, we addressed these que…	temperate	Germany	Europe	1	MODIS	[2,3]	4	2001	2003	1	2	alpha	2	1	[explorative statistics, spectral species]	2	2	0
Schneider, FD; Morsdorf, F; Schmid, B; Petchey, OL; Hueni, A; Schimel, DS; Schaepman, ME	Schneider, FD	Mapping functional diversity from remotely sensed morphological and physiological forest traits	2017	NATURE PORTFOLIO	NATURE COMMUNICATIONS	14.919	10.1038/s41467-017-01530-3	Switzerland	130	Assessing functional diversity from space can help predict productivity and stability of forest ecosystems at global scale using biodiversity-ecosystem functioning relationships. We present a new spatially continuous method to map regional patterns of tree functional diversity using combined laser scanning and imaging spectroscopy. The method does not require prior taxonomic information and integ…	temperate	Switzerland	Europe	[2,4]	ALS	[1,3]	1	2010	2010	1	1	alpha	2	1	explorative statistics	[1,5]	0	0
Schneider, FD; Ferraz, A; Hancock, S; Duncanson, LI; Dubayah, RO; Pavlick, RP; Schimel, DS	Schneider, FD	Towards mapping the diversity of canopy structure from space with GEDI	2020	IOP PUBLISHING LTD	ENVIRONMENTAL RESEARCH LETTERS	6.793	10.1088/1748-9326/ab9e99	United States	26	Plant biodiversity supports life on Earth and provides a range of important ecosystem services, but is under severe pressure by global change. Structural diversity plays a crucial role for carbon, water and energy cycles and animal habitats. However, it is very difficult to map and monitor over large areas, limiting our ability to assess the status of biodiversity and predict change. NASA's Globa…	subtropical	United States	North America	4	ALS	1	1	2016	2017	0	1	[alpha,beta]	2	1	[trait probability density modelling,Random Forest Regression,PCA]	[1,3,4]	0	0
Senf, C; Mori, AS; Muller, J; Seidl, R	Senf, C	The response of canopy height diversity to natural disturbances in two temperate forest landscapes	2020	SPRINGER	LANDSCAPE ECOLOGY	3.848	10.1007/s10980-020-01085-7	Germany	10	Context Structural diversity strongly influences habitat quality and the functioning of forest ecosystems. An important driver of the variation in forest structures are disturbances. As disturbances are increasing in many forest ecosystems around the globe, it is important to understand how structural diversity responds to (changing) disturbances. Objectives Our aim was to quantify the relationsh…	temperate	Germany	Europe	4	ALS	1	1	2009	2012	0	1	[alpha,beta,gamma]	2	1	Bayesian Generalized Additive Mixed Models	1	0	0
Shahtahmassebi, AR; Lin, Y; Lin, L; Atkinson, PM; Moore, N; Wang, K; He, S; Huang, LY; Wu, JX; Shen, ZQ; Gan, MY; Zheng, XY; Su, Y; Teng, HF; Li, XY; Deng, JS; Sun, YY; Zhao, MZ	Shahtahmassebi, AR	Reconstructing Historical Land Cover Type and Complexity by Synergistic Use of Landsat Multispectral Scanner and CORONA	2017	MDPI AG	REMOTE SENSING	4.848	10.3390/rs9070682	China	9	Survey data describing land cover information such as type and diversity over several decades are scarce. Therefore, our capacity to reconstruct historical land cover using field data and archived remotely sensed data over large areas and long periods of time is somewhat limited. This study explores the relationship between CORONA texture-a surrogate for actual land cover type and complexity-with…	subtropical	China	Asia	[1,1]	[CORONA,Landsat 3]	2	[2,4]	1975	1978	0	1	alpha	2	1	[Pearson correlation,regression models,Kriging,Moran's I]	2	2	[S5,S6,S7,nvi,ndvi,tasseled cap]
Silveira, EMO; Radeloff, VC; Martinuzzi, S; Pastur, GJM; Rivera, LO; Politi, N; Lizarraga, L; Farwell, LS; Elsen, PR; Pidgeon, AM	Silveira, EMO	Spatio-temporal remotely sensed indices identify hotspots of biodiversity conservation concern	2021	ELSEVIER SCIENCE INC	REMOTE SENSING OF ENVIRONMENT	10.164	10.1016/j.rse.2021.112368	United States	6	Over the course of a year, vegetation and temperature have strong phenological and seasonal patterns, respectively, and many species have adapted to these patterns. High inter-annual variability in the phenology of vegetation and in the seasonality of temperature pose a threat for biodiversity. However, areas with high spatial variability likely have higher ecological resilience where inter-annua…	subtropical	Argentina	South America	[1,1]	[MODIS,Landsat 8]	[2,2]	[4,3]	2001	2018	0	3	alpha	2	1	[TIMESAT,Pearson Correlation,PCA,Getis-Ord Gi]	2	[blue,red,nir,tir]	evi
Siren, A; Tuomisto, H; Navarrete, H	Siren, A	Mapping environmental variation in lowland Amazonian rainforests using remote sensing and floristic data	2013	TAYLOR & FRANCIS LTD	INTERNATIONAL JOURNAL OF REMOTE SENSING	3.151	10.1080/01431161.2012.723148	Finland	18	This article describes a method for detailed mapping of ecological variation in a tropical rainforest based on field inventory of pteridophytes (ferns and lycophytes) and remote sensing using Landsat Enhanced Thematic Mapper Plus (ETM+) imagery. Previously known soil cation optima of the pteridophyte species were first used in calibration, i.e. to infer soil cation concentrations for sites on the…	tropical	Ecuador	South America	1	Landsat 7	[2,3]	3	2005	2005	1	1	beta	2	1	[stepwise multiple regression,multiple regression,PCoA]	2	2	0
Somers, B; Asner, GP; Martin, RE; Anderson, CB; Knapp, DE; Wright, SJ; Van De Kerchove, R	Somers, B	Mesoscale assessment of changes in tropical tree species richness across a bioclimatic gradient in Panama using airborne imaging spectroscopy	2015	ELSEVIER SCIENCE INC	REMOTE SENSING OF ENVIRONMENT	10.164	10.1016/j.rse.2015.04.016	Belgium	15	We used imaging spectroscopy to perform a top-down mesoscale analysis of tropical tree species richness across a bioclimatic gradient in Panama. The expressed precipitation gradient from the wet Caribbean side to the dry Pacific side makes Panama an excellent study area for performing a mesoscale assessment of climate effects on tropical tree species richness. Spatial patterns in local spectral v…	tropical	South Africa	North America	[2,4]	CAO-2 AToMS	[1,3]	[1,1]	2012	2012	1	1	alpha	2	1	[CV,spectral similarity index,GLM,spectral species area curves,species area curves]	[1,3]	1	ndvi
Stickler, CM; Southworth, J	Stickler, CM	Application of multi-scale spatial and spectral analysis for predicting primate occurrence and habitat associations in Kibale National Park, Uganda	2008	ELSEVIER SCIENCE INC	REMOTE SENSING OF ENVIRONMENT	10.164	10.1016/j.rse.2007.10.013	United States	34	Remote sensing has made important contributions to biodiversity conservation planning through the measurement of deforestation rates, habitat fragmentation, habitat degradation, and isolation of protected areas in human altered landscapes. Progress in using remote sensing together with field data for the development of robust habitat suitability models has been more modest. In this paper, we pres…	tropical	Uganda	Africa	[1,1]	[Quickbird,Landsat 7]	[2,3]	[1,3]	2003	2003	1	1	alpha	1	2	[logistic regression,linear regression]	2	2	[ndvi,tasseled cap]
Tagliabue, G; Panigada, C; Celesti, M; Cogliati, S; Colombo, R; Migliavacca, M; Rascher, U; Rocchini, D; Schuttemeyer, D; Rossini, M	Tagliabue, G	Sun-induced fluorescence heterogeneity as a measure of functional diversity	2020	ELSEVIER SCIENCE INC	REMOTE SENSING OF ENVIRONMENT	10.164	10.1016/j.rse.2020.111934	Italy	5	Plant functional diversity, defined as the range of plant chemical, physiological and structural properties within plants, is a key component of biodiversity which controls the ecosystem functioning and stability. Monitoring its variations across space and over time is critical in ecological studies. So far, several reflectance-based metrics have been tested to achieve this objective, yielding di…	temperate	France	Europe	2	HyPlant	[1,3]	1	2013	2013	1	1	[alpha,beta]	2	1	[SVM,Rao,CV,RTM,linear regression]	1	1	ndvi
Tamburlin, D; Torresani, M; Tomelleri, E; Tonon, G; Rocchini, D	Tamburlin, D	Testing the Height Variation Hypothesis with the R rasterdiv Package for Tree Species Diversity Estimation	2021	MDPI	REMOTE SENSING	4.848	10.3390/rs13183569	Italy	0	Forest biodiversity is a key element to support ecosystem functions. Measuring biodiversity is a necessary step to identify critical issues and to choose interventions to be applied in order to protect it. Remote sensing provides consistent quality and standardized data, which can be used to estimate different aspects of biodiversity. The Height Variation Hypothesis (HVH) represents an indirect m…	temperate	Italy	Europe	4	ALS	[1,3]	1	2004	2006	1	1	[alpha,beta]	2	1	[Shannon,Rao,linear regression]	1	0	0
Thessler, S; Ruokolainen, K; Tuomisto, H; Tomppo, E	Thessler, S	Mapping gradual landscape-scale floristic changes in Amazonian primary rain forests by combining ordination and remote sensing	2005	WILEY	GLOBAL ECOLOGY AND BIOGEOGRAPHY	7.144	10.1111/j.1466-822x.2005.00158.x	Finland	63	Aim We present a new method to economically map gradual changes in plant species composition in lowland rain forests using field data and satellite images. Such a method will be a useful tool in planning the sustainable use and conservation of Amazonian rain forests. Location The study covered an area of c. 700 km(2) of primary rain forest in Amazonian Ecuador. Methods We field inventoried the sp…	subtropical	Ecuador	South America	1	Landsat 5	[2,3]	3	1995	1995	1	1	[alpha,beta]	2	1	[explorative statistics,NMDS,k nearest neighbors]	[2,5]	2	0
Torresani, M; Rocchini, D; Sonnenschein, R; Zebisch, M; Marcantonio, M; Ricotta, C; Tonon, G	Torresani, M	Estimating tree species diversity from space in an alpine conifer forest: The Rao's Q diversity index meets the spectral variation hypothesis	2019	ELSEVIER	ECOLOGICAL INFORMATICS	3.142	10.1016/j.ecoinf.2019.04.001	Italy	25	Forests cover about 30% of the Earth surface, they are among the most biodiverse terrestrial ecosystems and represent the bulk of many ecological processes and services. The assessment of biodiversity is an important and essential goal to achieve but it can results difficult, time consuming and expensive when based on field data. Remote sensing covers large areas and provides consistent quality a…	temperate	Italy	Europe	[1,1]	[Sentinel-2,Landsat 8]	[2,3]	[2,3]	2016	2017	1	3	alpha	2	1	[Rao,linear regression]	2	[red,nir]	ndvi
Torresani, M; Rocchini, D; Sonnenschein, R; Zebisch, M; Hauffe, HC; Heym, M; Pretzsch, H; Tonon, G	Torresani, M	Height variation hypothesis: A new approach for estimating forest species diversity with CHM LiDAR data	2020	ELSEVIER	ECOLOGICAL INDICATORS	4.958	10.1016/j.ecolind.2020.106520	Italy	10	An indirect method for estimating biodiversity from Earth observations is the Spectral Variation Hypothesis (SVH). SVH states that the higher the spatial variability of the spectral response of an optical remotely sensed image, the higher the number of available ecological niches and hence, the higher the diversity of tree species in the considered area. Here for the first time we apply the conce…	temperate	[Italy,Germany]	Europe	4	ALS	[1,3]	1	2006	2018	1	1	alpha	2	1	[Rao,Shannon,Simpson,species richness,linear regression]	1	0	0
Torresani, M; Feilhauer, H; Rocchini, D; Feret, JB; Zebisch, M; Tonon, G	Torresani, M	Which optical traits enable an estimation of tree species diversity based on the Spectral Variation Hypothesis?	2021	WILEY	APPLIED VEGETATION SCIENCE	3.252	10.1111/avsc.12586	Italy	1	Question Which optical traits, retrieved from biophysical models applied to Sentinel-2 images, enable an estimation of tree species diversity based on the Spectral Variation Hypothesis? Location Coniferous mountain forest in the eastern Italian Alps. Methods We analyzed the PROSPECT-5 and Invertible Forest Reflectance Model (INFORM) biophysical parameters as retrieved from canopy reflectance data…	temperate	Italy	Europe	1	Sentinel-2	[2,3]	2	2017	2019	1	3	alpha	2	1	[Prospect-5,INFORM,Rao,RFR,linear regression]	2	2	0
Tuomisto, H; Ruokolainen, K; Aguilar, M; Sarmiento, A	Tuomisto, H	Floristic patterns along a 43-km long transect in an Amazonian rain forest	2003	WILEY	JOURNAL OF ECOLOGY	6.256	10.1046/j.1365-2745.2003.00802.x	Peru	179	1 The floristic variation in Amazonian lowland forests is poorly understood, especially in the large areas of non-inundated (tierra firme) rain forest. Species composition may be either unpredictable as abundances fluctuate in a random walk, more-or-less uniform, or it may correspond to environmental heterogeneity. 2 We tested the three hypotheses by studying the floristic variation of two phylog…	tropical	Peru	South America	1	Landsat 5	[2,3]	3	1987	1987	1	1	alpha	2	1	explorative statistics	[2,5]	2	ndvi
Tuomisto, H; Poulsen, AD; Ruokolainen, K; Moran, RC; Quintana, C; Celi, J; Canas, G	Tuomisto, H	Linking floristic patterns with soil heterogeneity and satellite imagery in Ecuadorian Amazonia	2003	ECOLOGICAL SOC AMER	ECOLOGICAL APPLICATIONS	4.657	10.1890/1051-0761(2003)013[0352:LFPWSH]2.0.CO;2	Ecuador	178	Florisitic ground surveys in tropical rain forests are laborious and time consuming, so we tested to what degree reflectance differences visible in Landsat Thematic Mapper (TM) satellite images can be used to predict differences in florisitic composition and species richness among rain forest sites. To gain ecological understanding of the rain forest ecosystem, we also tested to what extent varia…	subtropical	Ecuador	South America	1	Landsat 5	[2,3]	3	1995	1995	1	1	alpha	2	1	explorative statistics	[2,5]	2	0
Vegh, L; Tsuyuzaki, S	Vegh, L	Remote sensing of forest diversities: the effect of image resolution and spectral plot extent	2021	TAYLOR & FRANCIS LTD	INTERNATIONAL JOURNAL OF REMOTE SENSING	3.151	10.1080/01431161.2021.1934596	Japan	0	Detecting field diversities via remote sensing is becoming important to monitor vegetation dynamics at large scale. The characteristics of the remotely sensed image, depending on the study organism and habitat, affect the efficiency of measuring alpha-and beta-diversities. Therefore, we examined the impact of image resolutions and spectral plot extents on the accuracy of estimating forest alpha-d…	temperate	Japan	Asia	1	IKONOS	[2,3]	1	2014	2014	1	1	[alpha,beta]	2	1	[Pearson correlations,linear regression models,Kruskal-Wallis,Wilcoxon,X2,stepwise multiple regression,Moran's I,Mantel test,ANOSIM]	2	[blue,green,red,nir]	ndvi
Viedma, O; Torres, I; Perez, B; Moreno, JM	Viedma, O	Modeling plant species richness using reflectance and texture data derived from QuickBird in a recently burned area of Central Spain	2012	ELSEVIER SCIENCE INC	REMOTE SENSING OF ENVIRONMENT	10.164	10.1016/j.rse.2011.12.024	Spain	38	Species richness increases markedly during the first years after fire, driven mainly by the increase in the number of herbaceous species. However, such increase is variable in space and time, due to the role that the different plant life-forms can play after the fire disturbance. In addition, the absence of reliable species richness information can be a limitation for decision making when postfir…	subtropical	Spain	Europe	1	Quickbird	[2,3]	1	2003	2003	1	1	alpha	1	1	[explorative statistics,regression tree analysis,boosted regression trees]	2	[blue,green,red,nir]	ndvi
Vina, A; Tuanmu, MN; Xu, WH; Li, Y; Qi, JG; Ouyang, ZY; Liu, JG	Vina, A	Relationship between floristic similarity and vegetated land surface phenology: Implications for the synoptic monitoring of species diversity at broad geographic regions	2012	ELSEVIER SCIENCE INC	REMOTE SENSING OF ENVIRONMENT	10.164	10.1016/j.rse.2012.02.013	United States	16	Assessing species composition and its changes through time across broad geographic regions is time consuming and a difficult endeavor. The synoptic view provided by imaging remote sensors offers an alternative. But while many studies have developed procedures for assessing biodiversity using multi- and hyper-spectral imagery, they may only provide snapshots at particular months/seasons due to the…	temperate	China	Asia	1	MODIS	[2,3]	4	2004	2007	1	3	[alpha,beta]	2	1	[Mantel test,linear models,NMDS,PCA,Moran's I,spatial autoregressive models]	2	[blue,green,red,nir]	[ndvi,evi,wdrvi,vari]
Wang, DZ; Qiu, PH; Wan, B; Cao, ZX; Zhang, QF	Wang, DZ	Mapping alpha- and beta-diversity of mangrove forests with multispectral and hyperspectral images	2022	ELSEVIER SCIENCE INC	REMOTE SENSING OF ENVIRONMENT	10.164	10.1016/j.rse.2022.113021	China	0	Mangrove deforestation has rapidly declined by an order of magnitude compared to that reported for the 20th century, but the remaining mangrove ecosystems are still undergoing biodiversity loss and degradation. Laborintensive ground surveys that are usually used for terrestrial plant biodiversity assessment are difficult to conduct in the mangrove forests. Assessing plant biodiversity from space …	tropical	China	Asia	[1,1,2]	[WorldView-2,Sentinel-2,Zhuhai-1]	[2,3]	[1,2,2]	2018	2020	1	1	[alpha,beta,gamma]	2	1	PCA	2	[1,blue,green,red,nir]	ndvi
Warren, SD; Alt, M; Olson, KD; Irl, SDH; Steinbauer, MJ; Jentsch, A	Warren, SD	The relationship between the spectral diversity of satellite imagery, habitat heterogeneity, and plant species richness	2014	ELSEVIER SCIENCE BV	ECOLOGICAL INFORMATICS	3.142	10.1016/j.ecoinf.2014.08.006	United States	28	Assessment of habitat heterogeneity and plant species richness at the landscape scale is often based on intensive and extensive fieldwork at great cost of time and money. We evaluated the use of satellite imagery as a quantitative measure of the relationship between the spectral diversity of satellite imagery, habitat heterogeneity, and plant species richness. A 16 km(2) portion of a military tra…	temperate	Germany	Europe	1	IKONOS	[2,3]	1	2005	2005	1	1	alpha	2	1	[original band stats, compressed data stats, unsup classifications, PCA, feature space measurements, semivarigram descriptors]	2	[blue,green,red,nir]	ndvi
White, JC; Gomez, C; Wulder, MA; Coops, NC	White, JC	Characterizing temperate forest structural and spectral diversity with Hyperion EO-1 data	2010	ELSEVIER SCIENCE INC	REMOTE SENSING OF ENVIRONMENT	10.164	10.1016/j.rse.2010.02.012	Canada	36	Forest structural diversity can serve as an important indicator of biodiversity. The relationship between spaceborne hyperspectral remotely sensed data and several measures of forest structure was explored over a 625 km(2) coastal temperate forest landscape on Vancouver Island, British Columbia, Canada. Thirteen Hyperion bands were selected for analysis based on the documented and hypothesized im…	temperate	Canada	North America	2	Hyperion	[2,3]	3	2001	2001	1	1	alpha	1	1	explorative statistics	2	1	0
Zhao, YJ; Zeng, Y; Zheng, ZJ; Dong, WX; Zhao, D; Wu, BF; Zhao, QJ	Zhao, YJ	Forest species diversity mapping using airborne LiDAR and hyperspectral data in a subtropical forest in China	2018	ELSEVIER SCIENCE INC	REMOTE SENSING OF ENVIRONMENT	10.164	10.1016/j.rse.2018.05.014	China	23	Monitoring biodiversity is essential for the conservation and management of forest resources. A method called spectranomics that maps the diversity of forest species based on species-driven leaf optical traits using imaging spectroscopy has been developed for tropical forests in earlier studies. In this study we applied the spectranomics method in combination with airborne hyperspectral (PHI-3 se…	subtropical	China	Asia	[2,4]	[PHI-3,ALS]	[1,3]	1	2013	2013	1	1	alpha	2	1	[Self-adaptive Fuzzy C-Means Clustering, ANOVA,RFR]	1	1	[ndvi,ndni,cri,tcari_osavi,sr705750,pri,ndli,ndwi]
Zhirin, VM; Knyazeva, SV; Eydlina, SP	Zhirin, VM	Long-term dynamics of vegetation indices in dark coniferous forest after Siberian moth disturbance	2016	MAIK NAUKA/INTERPERIODICA/SPRINGER	CONTEMPORARY PROBLEMS OF ECOLOGY	0.771	10.1134/S1995425516070118	Russian Federation	4	This study considers long-term dynamics of the vegetation indices derived from Landsat imagery of the period from 1989 to 2014. The mass death and damage of forests by Siberian moth occurred in dark coniferous taiga in 1994-1996. The images have covered both altered (disturbed) and background forest conditions. The case study of the forest massive is located in the model area of the Angara Taiga …	sub-frigid	Russian Federation	Asia	[1,1,1]	[Landsat 5,Landsat 7,Landsat 8]	[2,3]	3	1989	2014	1	2	alpha	1	1	plots only	2	[red,nir,swir]	[ndvi,swvi]
